# Supplementary material for: Widespread losses of pollinating insects in Britain
Source: PubMed Central journal article supplement (PMC6435717; doi:10.1038/s41467-019-08974-9), 2019-03-26
Supplement: 41467_2019_8974_MOESM3_ESM.pdf [file 41467_2019_8974_MOESM3_ESM.pdf]

## **Description of Additional Supplementary Files**

File Name: Supplementary Data 1

Description: A summary table showing the breakdown of bee and hoverfly species in each of the trait grouping categories. Non-eusocial species are referred to a solitary species in the text describing this study.
